# Supplementary material for: Association between Perfluoroalkyl Substances in Follicular Fluid and Polycystic Ovary Syndrome in Infertile Women
Source: MDPI journal article supplement (doi:10.3390/toxics12020104), 2024-01-26
Supplement: s1 [file s1]

**Association between perfluoroalkyl substances in follicular fluid and polycystic  
ovary syndrome in infertile women**

Sen Li <sup>1,2,†</sup>, Guojing Li <sup>1,2,†</sup>, Yu Lin <sup>1,2</sup>, Feng Sun <sup>1,2</sup>, Liqiang Zheng <sup>3</sup>, Yingying Yu <sup>1,2,\*</sup>, Hong Xu <sup>1,2,\*</sup>

† These two authors contributed equally to this work and should be considered co-first authors.

<sup>1</sup> International Peace Maternity & Child Health Hospital, School of Medicine, Shanghai Jiao Tong University, Shanghai, China.

<sup>2</sup> Shanghai Municipal Key Clinical Speciality, Shanghai, China.

<sup>3</sup> School of Public Health, School of Medicine, Shanghai Jiao Tong University, Shanghai, China.

\* Corresponding author:

Hong Xu, MD, PhD, Address: No.910 Hengshan Road, Xuhui District, Shanghai, China. Telephone: +86-18017316266.

E-mail: [xuhong1558@sjtu.edu.cn](mailto:xuhong1558@sjtu.edu.cn).

Yingying Yu, MD, PhD, Address: No.910 Hengshan Road, Xuhui District, Shanghai, China. Telephone: +86-13564702091

E-mail: [yu-ying-ying@163.com](mailto:yu-ying-ying@163.com).

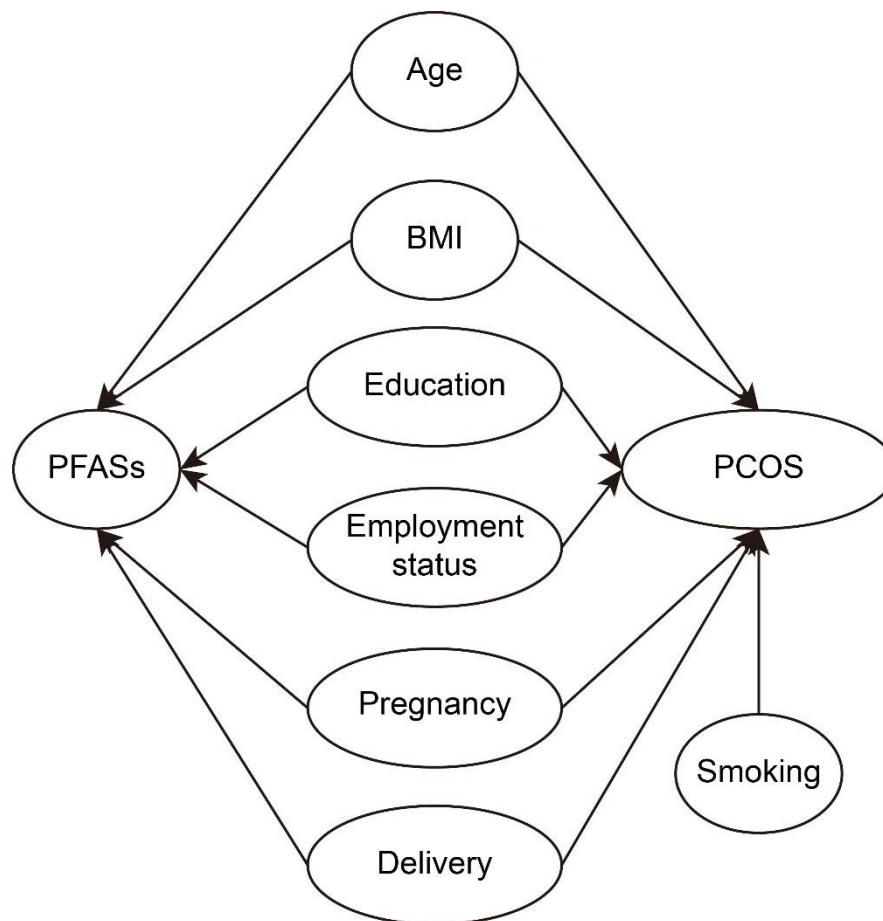

**Fig. S1.** Directed acyclic graphs (DAGs)

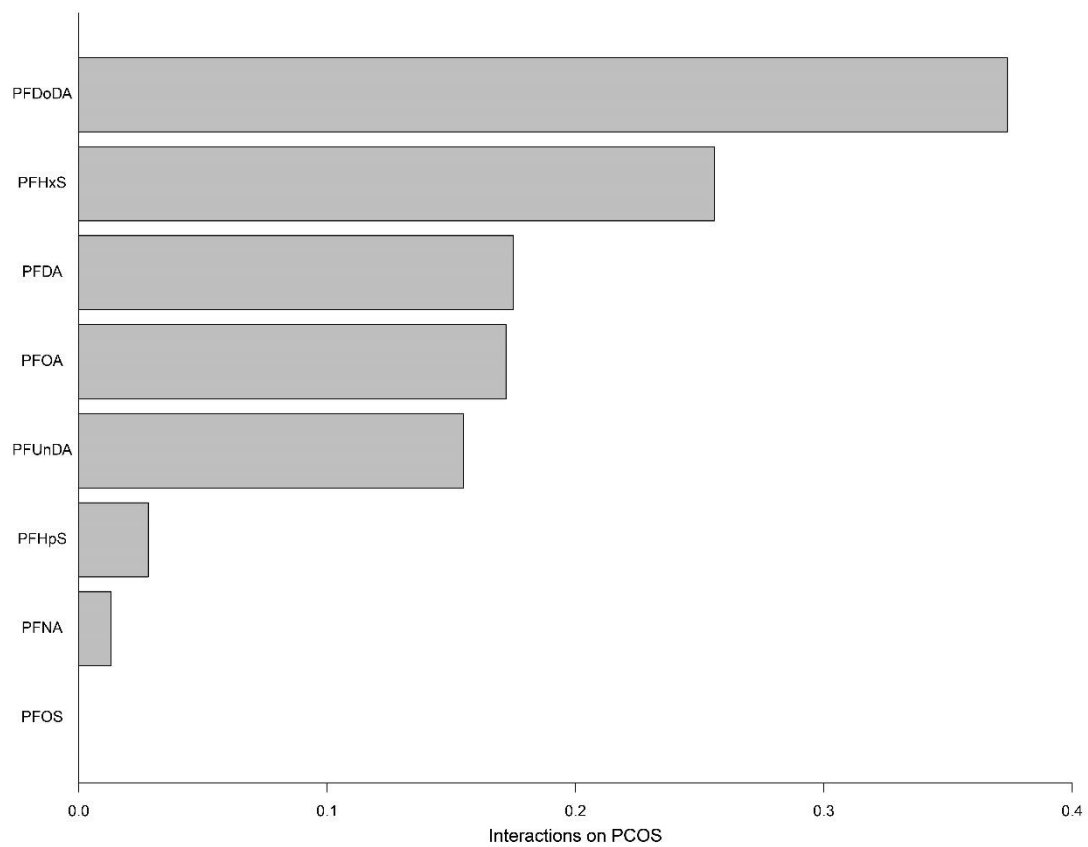

**Fig. S2.** Interaction of individual PFAS in the associations with PCOS in XGBoost analysis. Estimates were adjusted for women's age, BMI, employment status, educational level, active/passive smoking, pregnancy and delivery.

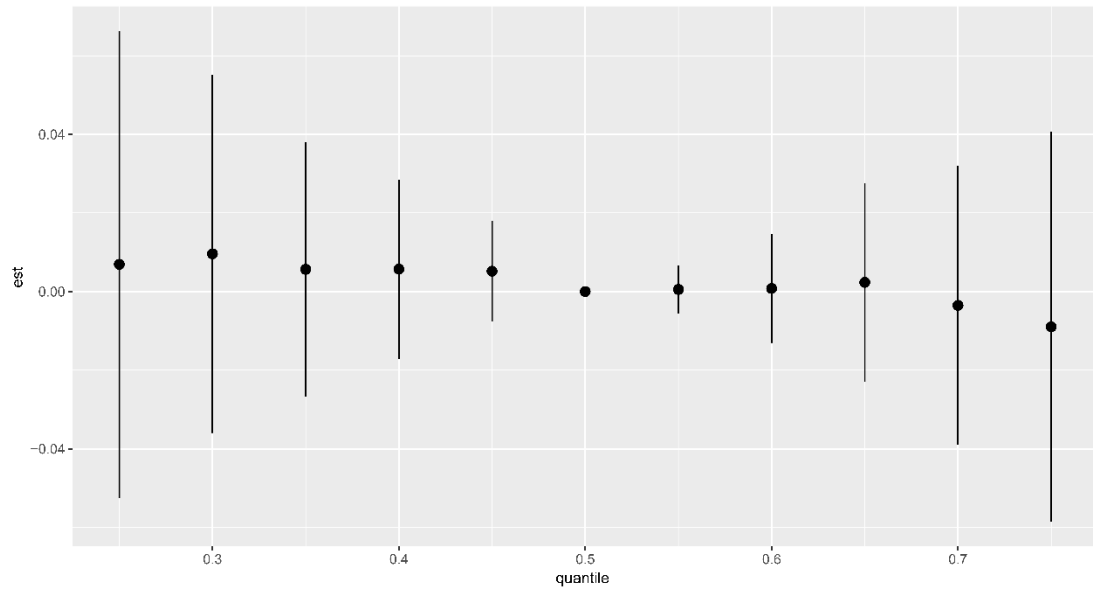

**Fig. S3.** The cumulative impact of PFASs (estimates with 95% confidence intervals). PFASs are at a particular percentile (X-axis) compared to when all exposures are at the 50th percentile.

**Table S1** Spearman correlation coefficients between follicular fluid concentration of PFASs and hormone in serum in the control group (n = 218).

|        | FSH    | LH     | E2     | P      | T     | PRL    |
|--------|--------|--------|--------|--------|-------|--------|
| PFOA   | -0.094 | 0.056  | 0.022  | 0.031  | 0.124 | 0.131  |
| PFNA   | -0.050 | 0.070  | 0.006  | 0.072  | 0.127 | 0.131  |
| PFDA   | -0.022 | 0.047  | 0.008  | 0.019  | 0.113 | 0.138* |
| PFUnDA | -0.023 | 0.128  | 0.039  | 0.008  | 0.091 | 0.126  |
| PFDoDA | -0.002 | -0.066 | 0.043  | -0.086 | 0.002 | 0.006  |
| PFHxS  | -0.013 | 0.038  | -0.026 | 0.083  | 0.065 | 0.130  |
| PFHpS  | -0.030 | 0.098  | 0.051  | 0.113  | 0.103 | 0.135* |
| PFOS   | 0.003  | 0.043  | 0.022  | 0.069  | 0.101 | 0.161* |

Abbreviations: FSH, follicle stimulating hormone, LH, luteinizing hormone, E2, estradiol, P, progesterone, T, testosterone, PRL, prolactin. \* P<0.05

**Table S2** P values for spearman correlation coefficients between follicular fluid concentration of PFASs and hormone in serum in the control group after Benjamini and Hochberg (BH) false discovery rate (FDR) adjustment.

|        | FSH  | LH   | E2   | P    | T    | PRL  |
|--------|------|------|------|------|------|------|
| PFOA   | 0.50 | 0.79 | 0.92 | 0.92 | 0.32 | 0.32 |
| PFNA   | 0.83 | 0.68 | 0.98 | 0.68 | 0.32 | 0.32 |
| PFDA   | 0.92 | 0.84 | 0.98 | 0.93 | 0.38 | 0.32 |
| PFUnDA | 0.92 | 0.32 | 0.86 | 0.98 | 0.50 | 0.32 |
| PFDoDA | 0.98 | 0.68 | 0.85 | 0.55 | 0.98 | 0.98 |
| PFHxS  | 0.98 | 0.86 | 0.92 | 0.56 | 0.68 | 0.32 |
| PFHpS  | 0.92 | 0.48 | 0.83 | 0.38 | 0.47 | 0.32 |
| PFOS   | 0.98 | 0.92 | 0.92 | 0.68 | 0.47 | 0.32 |

**Table S3** Odds ratios for follicular fluid concentrations of PFASs associated with PCOS s without adjustment for BMI (n = 291).

| PFASs  | Quartiles<br>(ng/mL)               | Adjusted OR<br>(95% CI) | P-value |
|--------|------------------------------------|-------------------------|---------|
| PFOA   | 1 <sup>st</sup> ( $\leq 5.05$ )    | 1.00 (reference)        |         |
|        | 2 <sup>nd</sup> ( $> 5.05, 7.04$ ) | 3.98 (1.64, 9.69)       | 0.002   |
|        | 3 <sup>rd</sup> ( $> 7.04, 9.84$ ) | 3.39 (1.38, 8.30)       | 0.008   |
|        | 4 <sup>th</sup> ( $> 9.84$ )       | 3.20 (1.27, 8.12)       | 0.014   |
|        | P for trend**                      | 0.016                   |         |
| PFNA   | 1 <sup>st</sup> ( $\leq 0.70$ )    | 1.00 (reference)        |         |
|        | 2 <sup>nd</sup> ( $> 0.70, 1.04$ ) | 2.48 (1.10, 5.62)       | 0.029   |
|        | 3 <sup>rd</sup> ( $> 1.04, 1.49$ ) | 1.75 (0.76, 4.02)       | 0.186   |
|        | 4 <sup>th</sup> ( $> 1.49$ )       | 1.12 (0.48, 2.63)       | 0.798   |
|        | P for trend**                      | 0.108                   |         |
| PFDA   | 1 <sup>st</sup> ( $\leq 0.70$ )    | 1.00 (reference)        |         |
|        | 2 <sup>nd</sup> ( $> 0.70, 1.19$ ) | 0.68 (0.30, 1.57)       | 0.368   |
|        | 3 <sup>rd</sup> ( $> 1.19, 1.92$ ) | 1.41 (0.66, 3.03)       | 0.374   |
|        | 4 <sup>th</sup> ( $> 1.92$ )       | 0.68 (0.31, 1.52)       | 0.351   |
|        | P for trend**                      | 0.235                   |         |
| PFUnDA | 1 <sup>st</sup> ( $\leq 0.39$ )    | 1.00 (reference)        |         |
|        | 2 <sup>nd</sup> ( $> 0.39, 0.67$ ) | 1.29 (0.58, 2.91)       | 0.535   |
|        | 3 <sup>rd</sup> ( $> 0.67, 1.09$ ) | 0.96 (0.43, 2.16)       | 0.929   |
|        | 4 <sup>th</sup> ( $> 1.09$ )       | 0.48 (0.20, 1.17)       | 0.107   |
|        | P for trend**                      | 0.159                   |         |
| PFDoDA | 1 <sup>st</sup> ( $\leq 0.11$ )    | 1.00 (reference)        |         |
|        | 2 <sup>nd</sup> ( $> 0.11, 0.16$ ) | 0.97 (0.45, 2.09)       | 0.946   |
|        | 3 <sup>rd</sup> ( $> 0.16, 0.22$ ) | 0.64 (0.29, 1.41)       | 0.264   |
|        | 4 <sup>th</sup> ( $> 0.22$ )       | 0.41 (0.18, 0.97)       | 0.042   |
|        | P for trend**                      | 0.147                   |         |
| PFHxS  | 1 <sup>st</sup> ( $\leq 0.87$ )    | 1.00 (reference)        |         |
|        | 2 <sup>nd</sup> ( $> 0.87, 1.41$ ) | 2.83 (1.20, 6.69)       | 0.018   |
|        | 3 <sup>rd</sup> ( $> 1.41, 2.84$ ) | 2.52 (1.04, 6.10)       | 0.041   |
|        | 4 <sup>th</sup> ( $> 2.84$ )       | 2.14 (0.90, 5.09)       | 0.084   |
|        | P for trend**                      | 0.093                   |         |
| PFHpS  | 1 <sup>st</sup> ( $\leq 0.05$ )    | 1.00 (reference)        |         |
|        | 2 <sup>nd</sup> ( $> 0.05, 0.09$ ) | 1.40 (0.64, 3.06)       | 0.407   |
|        | 3 <sup>rd</sup> ( $> 0.09, 0.14$ ) | 1.44 (0.65, 3.19)       | 0.364   |
|        | 4 <sup>th</sup> ( $> 0.14$ )       | 0.90 (0.39, 2.10)       | 0.809   |
|        | P for trend**                      | 0.590                   |         |
| PFOS   | 1 <sup>st</sup> ( $\leq 3.94$ )    | 1.00 (reference)        |         |
|        | 2 <sup>nd</sup> ( $> 3.94, 5.99$ ) | 1.10 (0.49, 2.46)       | 0.812   |
|        | 3 <sup>rd</sup> ( $> 5.99, 9.11$ ) | 1.10 (0.50, 2.41)       | 0.819   |
|        | 4 <sup>th</sup> ( $> 9.11$ )       | 0.65 (0.28, 1.50)       | 0.314   |

P for trend\*\*

0.588

---

Abbreviations: OR, odds ratio; CI, confidence interval; PCOS, polycystic ovarian syndrome.

\* Adjusted for age, employment status, educational level, active/passive smoking, pregnancy and delivery.

\*\* P-value for test of trend across quartiles.
